# Supplementary material for: High Antibodies to VAR2CSA in Response to Malaria Infection Are Associated With Improved Birthweight in a Longitudinal Study of Pregnant Women
Source: PubMed Central journal article supplement (PMC8242957; doi:10.3389/fimmu.2021.644563), 2021-06-16
Supplement: DataSheet_1.pdf [file DataSheet_1.pdf]

## Supplementary Materials

**Supplementary Table S1. Adjusted odds ratios for placental *P. falciparum* infection in high antibody responders relative to low responders with effect modification by infection at enrolment status**

| Antibody     | Infected |      |      |       | Uninfected |      |      |       | Likelihood ratio test (p value) |
|--------------|----------|------|------|-------|------------|------|------|-------|---------------------------------|
|              | OR       | LL   | UL   | p     | OR         | LL   | UL   | p     |                                 |
| DBL3 (7G8)   | 0.57     | 0.24 | 1.37 | 0.208 | 2.24       | 1.18 | 4.25 | 0.014 | 0.009                           |
| DBL5 (3D7)   | 0.17     | 0.06 | 0.52 | 0.002 | 1.97       | 1.03 | 3.77 | 0.039 | <0.001                          |
| DBL5 (7G8)   | 0.58     | 0.29 | 1.19 | 0.140 | 1.71       | 0.95 | 3.09 | 0.074 | 0.011                           |
| PfCS2-IE     | 0.80     | 0.56 | 1.15 | 0.227 | 1.10       | 0.82 | 1.46 | 0.531 | 0.107                           |
| AMA1 - (3D7) | 0.94     | 0.47 | 1.85 | 0.848 | 0.97       | 0.57 | 1.67 | 0.925 | 0.911                           |

Antibodies were modeled as a continuous exposure. A high antibody responder is considered to have the 75<sup>th</sup> percentile value for each antibody; a low antibody responder is considered to have the 25<sup>th</sup> percentile value for each antibody. LL = lower limit of 95% CI; UL = upper limit of 95% CI. OR – odds ratio.

**Supplementary Table S2. Adjusted odds ratios for placental *P. falciparum* infection in high antibody responders relative to low responders with effect modification by gravidity (primigravid/multigravida)**

| Antibody     | Primigravid |      |      |       | Multigravid |      |      |       | Likelihood ratio test (p value) |
|--------------|-------------|------|------|-------|-------------|------|------|-------|---------------------------------|
|              | OR          | LL   | UL   | p     | OR          | LL   | UL   | p     |                                 |
| DBL3 (7G8)   | 0.86        | 0.37 | 1.99 | 0.719 | 1.84        | 0.98 | 3.46 | 0.059 | 0.147                           |
| DBL5 (3D7)   | 0.47        | 0.20 | 1.11 | 0.085 | 1.54        | 0.80 | 2.98 | 0.194 | 0.027                           |
| DBL5 (7G8)   | 0.88        | 0.40 | 1.91 | 0.740 | 1.34        | 0.78 | 2.31 | 0.291 | 0.367                           |
| PfCS2-IE     | 1.06        | 0.61 | 1.86 | 0.825 | 0.99        | 0.77 | 1.28 | 0.937 | 0.810                           |
| AMA1 - (3D7) | 1.04        | 0.56 | 1.94 | 0.900 | 0.94        | 0.52 | 1.69 | 0.831 | 0.811                           |

Antibodies were modeled as a continuous exposure. A high antibody responder is considered to have the 75<sup>th</sup> percentile value for each antibody; a low antibody responder is considered to have the 25<sup>th</sup> percentile value for each antibody. LL = lower limit of 95% CI; UL = upper limit of 95% CI. OR- odds ratio.

**Supplementary Table S3. Adjusted odds ratios for placental *P. falciparum* infection in high antibody responders relative to low responders without effect modification**

| Antibody     | All women |      |      |       |
|--------------|-----------|------|------|-------|
|              | OR        | LL   | UL   | p     |
| DBL3 (7G8)   | 1.41      | 0.85 | 2.36 | 0.184 |
| DBL5 (3D7)   | 1.00      | 0.59 | 1.69 | 0.995 |
| DBL5 (7G8)   | 1.17      | 0.74 | 1.86 | 0.492 |
| PfCS2-IE     | 1.00      | 0.79 | 1.27 | 0.987 |
| AMA1 - (3D7) | 0.99      | 0.64 | 1.52 | 0.946 |

Antibodies were modeled as a continuous exposure. A high antibody responder is considered to have the 75<sup>th</sup> percentile value for each antibody; a low antibody responder is considered to have the 25<sup>th</sup> percentile value for each antibody. LL = lower limit of 95% CI; UL = upper limit of 95% CI. OR – odds ratio

**Supplementary Table S4. Adjusted mean difference in birth weight (grams) in high antibody responders relative to low responders with effect modification by infection at enrolment**

| Antibody     | Infected             |      |      |       | Uninfected           |      |      |       | Likelihood ratio test (p value) |
|--------------|----------------------|------|------|-------|----------------------|------|------|-------|---------------------------------|
|              | Birth weight (grams) | LL   | UL   | p     | Birth weight (grams) | LL   | UL   | p     |                                 |
| DBL3 (7G8)   | +35                  | -106 | +176 | 0.622 | -13                  | -115 | +89  | 0.800 | 0.572                           |
| DBL5 (3D7)   | +149                 | +1   | +298 | 0.049 | -3                   | -112 | +106 | 0.954 | 0.093                           |
| DBL5 (7G8)   | +115                 | -7   | +237 | 0.064 | -8                   | -107 | +91  | 0.877 | 0.110                           |
| PfCS2-IE     | +86                  | +22  | +150 | 0.008 | -4                   | -51  | +44  | 0.879 | 0.019                           |
| AMA1 - (3D7) | -62                  | -178 | +55  | 0.299 | 25                   | -67  | +117 | 0.596 | 0.236                           |

Antibodies were modeled as a continuous exposure. A high antibody responder is considered to have the 75<sup>th</sup> percentile value for each antibody; a low antibody responder is considered to have the 25<sup>th</sup> percentile value for each antibody. LL = lower limit of 95% CI; UL = upper limit of 95% CI

**Supplementary Table S5. Adjusted mean difference in birth weight (grams) in high antibody responders relative to low responders with effect modification by gravidity (primigravid/multigravida)**

| Antibody     | Primigravid          |      |      |       | Multigravid          |      |      |       | Likelihood ratio test (p value) |
|--------------|----------------------|------|------|-------|----------------------|------|------|-------|---------------------------------|
|              | Birth weight (grams) | LL   | UL   | p     | Birth weight (grams) | LL   | UL   | p     |                                 |
| DBL3 (7G8)   | +8                   | -126 | +142 | 0.904 | +1                   | -102 | +103 | 0.991 | 0.926                           |
| DBL5 (3D7)   | +73                  | -70  | +217 | 0.316 | +36                  | -74  | +146 | 0.517 | 0.672                           |
| DBL5 (7G8)   | +73                  | -56  | +202 | 0.267 | +24                  | -70  | +118 | 0.611 | 0.525                           |
| PfCS2-IE     | +72                  | -27  | +172 | 0.152 | +20                  | -23  | +62  | 0.361 | 0.319                           |
| AMA1 - (3D7) | -74                  | -178 | +29  | 0.159 | +55                  | -46  | +157 | 0.286 | 0.072                           |

Antibodies were modeled as a continuous exposure. A high antibody responder is considered to have the 75<sup>th</sup> percentile value for each antibody; a low antibody responder is considered to have the 25<sup>th</sup> percentile value for each antibody. LL = lower limit of 95% CI; UL = upper limit of 95% CI

**Supplementary Table S6. Adjusted mean difference in birth weight (grams) in high antibody responders relative to low responders without effect modification**

| Antibody     | All women            |     |      |       |
|--------------|----------------------|-----|------|-------|
|              | Birth weight (grams) | LL  | UL   | p     |
| DBL3 (7G8)   | +3                   | -80 | +87  | 0.936 |
| DBL5 (3D7)   | +50                  | -40 | +139 | 0.274 |
| DBL5 (7G8)   | +41                  | -38 | +119 | 0.309 |
| PfCS2-IE     | +27                  | -12 | +67  | 0.176 |
| AMA1 - (3D7) | -8                   | -81 | +65  | 0.825 |

Antibodies were modeled as a continuous exposure. A high antibody responder is considered to have the 75<sup>th</sup> percentile value for each antibody; a low antibody responder is considered to have the 25<sup>th</sup> percentile value for each antibody. LL = lower limit of 95% CI; UL = upper limit of 95% CI

**Supplementary Table S7. Adjusted mean difference in gestational age at delivery (weeks) in high antibody responders relative to low responders with effect modification by infection at enrolment**

| Antibody     | Infected            |       |       |       | Uninfected          |       |       |       | Likelihood ratio test (p value) |
|--------------|---------------------|-------|-------|-------|---------------------|-------|-------|-------|---------------------------------|
|              | Birthweight (grams) | LL    | UL    | p     | Birthweight (grams) | LL    | UL    | p     |                                 |
| DBL3 (7G8)   | -0.48               | -1.23 | +0.26 | 0.199 | +0.11               | -0.43 | +0.65 | 0.682 | 0.187                           |
| DBL5 (3D7)   | +0.28               | -0.53 | +1.10 | 0.494 | +0.36               | -0.23 | +0.96 | 0.231 | 0.873                           |
| DBL5 (7G8)   | -0.02               | -0.68 | +0.63 | 0.942 | +0.25               | -0.28 | +0.78 | 0.349 | 0.500                           |
| PfCS2-IE     | -0.07               | -0.43 | +0.30 | 0.723 | +0.21               | -0.05 | +0.46 | 0.107 | 0.198                           |
| AMA1 - (3D7) | +0.02               | -0.62 | +0.65 | 0.960 | +0.09               | -0.41 | +0.59 | 0.727 | 0.856                           |

Antibodies were modeled as a continuous exposure. A high antibody responder is considered to have the 75<sup>th</sup> percentile value for each antibody; a low antibody responder is considered to have the 25<sup>th</sup> percentile value for each antibody. LL = lower limit of 95% CI; UL = upper limit of 95% CI

**Supplementary Table S8. Adjusted mean difference in gestational age at delivery (weeks) in high antibody responders relative to low responders with effect modification by gravidity (primigravid/multigravida)**

| Antibody     | Primigravid             |       |       |       | Multigravid             |       |       |       | Likelihood ratio test (p value) |
|--------------|-------------------------|-------|-------|-------|-------------------------|-------|-------|-------|---------------------------------|
|              | Gestational age (weeks) | LL    | UL    | p     | Gestational age (weeks) | LL    | UL    | p     |                                 |
| DBL3 (7G8)   | +0.01                   | -0.71 | +0.73 | 0.986 | -0.14                   | -0.68 | +0.39 | 0.596 | 0.729                           |
| DBL5 (3D7)   | +0.58                   | -0.20 | +1.36 | 0.145 | +0.20                   | -0.40 | +0.80 | 0.516 | 0.423                           |
| DBL5 (7G8)   | +0.23                   | -0.48 | +0.94 | 0.524 | +0.10                   | -0.39 | +0.60 | 0.682 | 0.764                           |
| PfCS2-IE     | +0.19                   | -0.49 | +0.88 | 0.575 | +0.12                   | -0.11 | +0.34 | 0.313 | 0.826                           |
| AMA1 - (3D7) | -0.08                   | -0.65 | +0.49 | 0.774 | +0.19                   | -0.35 | +0.74 | 0.487 | 0.481                           |

Antibodies were modeled as a continuous exposure. A high antibody responder is considered to have the 75<sup>th</sup> percentile value for each antibody; a low antibody responder is considered to have the 25<sup>th</sup> percentile value for each antibody. LL = lower limit of 95% CI; UL = upper limit of 95% CI



**Supplementary Table S9. Adjusted mean difference in gestational age at delivery (weeks) in high antibody responders relative to low responders without effect modification**

| <b>Antibody</b> | <b>All women</b>               |           |           |          |
|-----------------|--------------------------------|-----------|-----------|----------|
|                 | <b>Gestational age (weeks)</b> | <b>LL</b> | <b>UL</b> | <b>p</b> |
| DBL3 (7G8)      | -0.09                          | -0.53     | +0.35     | 0.681    |
| DBL5 (3D7)      | +0.34                          | -0.15     | +0.82     | 0.175    |
| DBL5 (7G8)      | +0.14                          | -0.27     | +0.56     | 0.499    |
| PfCS2-IE        | +0.12                          | -0.09     | +0.34     | 0.262    |
| AMA1 - (3D7)    | +0.06                          | -0.33     | +0.45     | 0.761    |

Antibodies were modeled as a continuous exposure. A high antibody responder is considered to have the 75<sup>th</sup> percentile value for each antibody; a low antibody responder is considered to have the 25<sup>th</sup> percentile value for each antibody. LL = lower limit of 95% CI; UL = upper limit of 95% CI
